# Supplementary material
Source: PubMed Central journal article supplement (PMC9401535)
Supplement: 10780432ccr210005-sup-258208_4_supp_7202685_qv243y.pdf [file 10780432ccr210005-sup-258208_4_supp_7202685_qv243y.pdf]

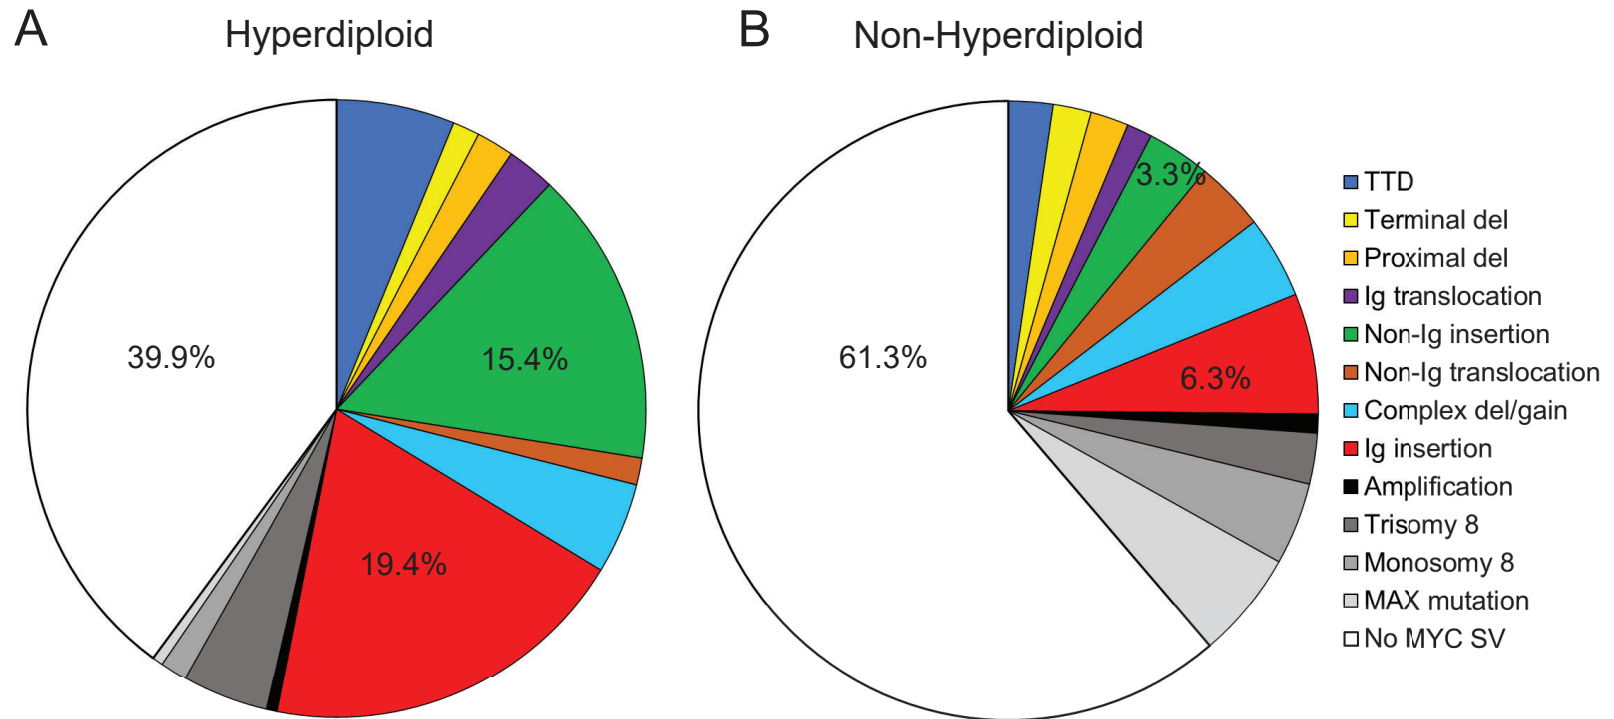

**Supplemental Figure 8: Distribution of MYC SVs in hyperdiploid and non-hyperdiploid groups.** Pie charts showing the distribution of the *MYC* SV in association with hyperdiploid in **A** and non-hyperdiploid in **B**.
