# Supplementary material
Source: PubMed Central journal article supplement (PMC9401535)
Supplement: 10780432ccr210005-sup-258208_4_supp_7202686_qv243y_7r.pdf [file 10780432ccr210005-sup-258208_4_supp_7202686_qv243y_7r.pdf]

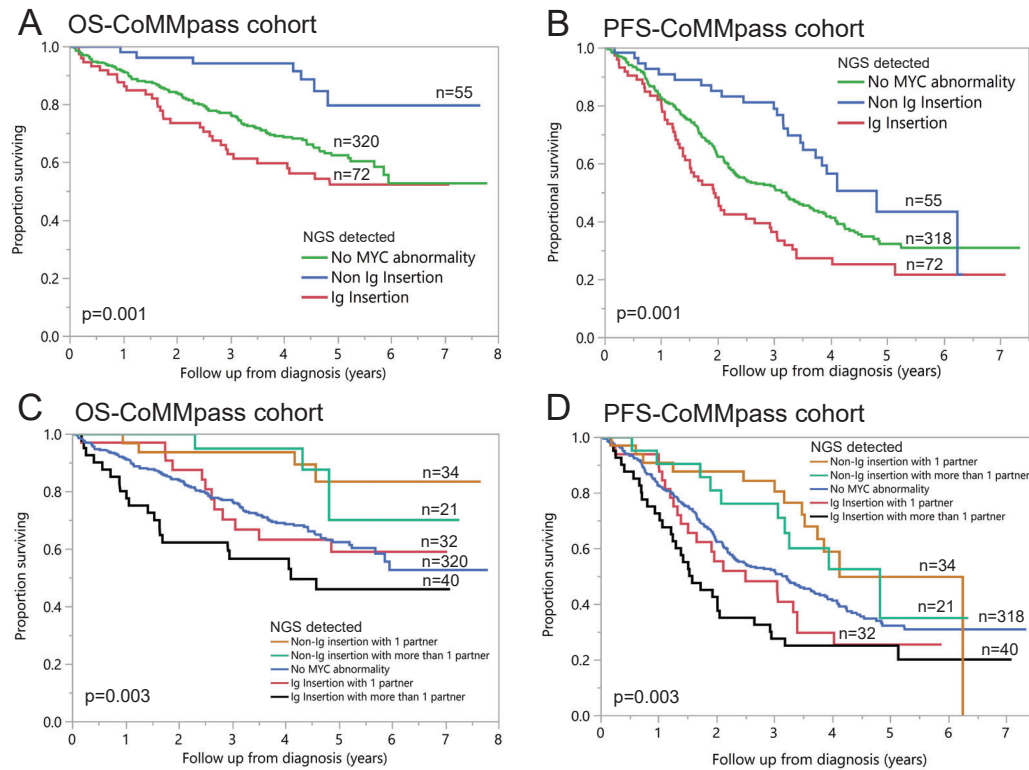

**Supplemental Figure 7: Impact of MYC SV on OS and PFS in CoMMpass cohort.** Comparison of OS (years) in **A** and PFS (years) in **B** in patients with no MYC abnormality (no MYC SV, MAX SNV, monosomy 8 and trisomy 8) (green line), with non-Ig insertion (blue line), and with Ig insertion (red line) detected by WGS from the CoMMpass cohort. OS time (mean) was 5.5 years [95%CI:5.2-5.9] (n=320), 6.9 [95%CI:6.3-7.4] years (n=55), and 4.7 [95%CI:4.1-5.3] years (n=72) in the no MYC abnormality, non-Ig insertion, and Ig insertion, respectively. PFS time (median) was 3.2 years [95%CI:2.4-3.9] (n=318), 4.8 [95%CI:3.6-6.1] years (n=55), and 1.9 [95%CI:1.5-2.4] years (n=72) in the no MYC abnormality, non-Ig insertion, and Ig insertion, respectively. Comparison of OS (years) in **C** and PFS (years) in **D** in patients with no MYC abnormality (no MYC SV, MAX SNV, monosomy 8 and trisomy 8) (blue line), with non-Ig insertion with 1 partner not including MYC (orange line), with non-Ig insertion with more than 1 partner not including MYC (green line), with Ig insertion with 1 partner not including MYC (red line), and with Ig insertion with more than 1 partner not including MYC (black line). OS time (mean) was 5.5 years [95%CI:5.2-5.9] (n=320), 6.9 [95%CI:6.2-7.6] years (n=34), 6.4 [95%CI:5.5-7.3] years (n=21), 5.2 [95%CI:4.4-6.0] years (n=32), 4.2 [95%CI:3.3-5.1] years (n=40), in the no MYC abnormality, non-Ig insertion 1 partner, non-Ig insertion more than 1 partner, Ig insertion 1 partner and Ig insertion more than 1 partner, respectively. PFS time (median) was 3.2 years [95%CI:2.4-3.9] (n=318), 4.1 [95%CI:3.3-4.9] years (n=34), 4.8 [95%CI:2.8-6.8] years (n=21), 2.5 [95%CI:0.7-4.3] years (n=32), 1.5 [95%CI:1.1-2.0] years (n=40), in the no MYC abnormality, non-Ig insertion 1 partner, non-Ig insertion more than 1 partner, Ig insertion 1 partner and Ig insertion more than 1 partner, respectively.
