# Supplementary material
Source: PubMed Central journal article supplement (PMC9401535)
Supplement: 10780432ccr210005-sup-258208_4_supp_7202690_qv243y_3r.pdf [file 10780432ccr210005-sup-258208_4_supp_7202690_qv243y_3r.pdf]

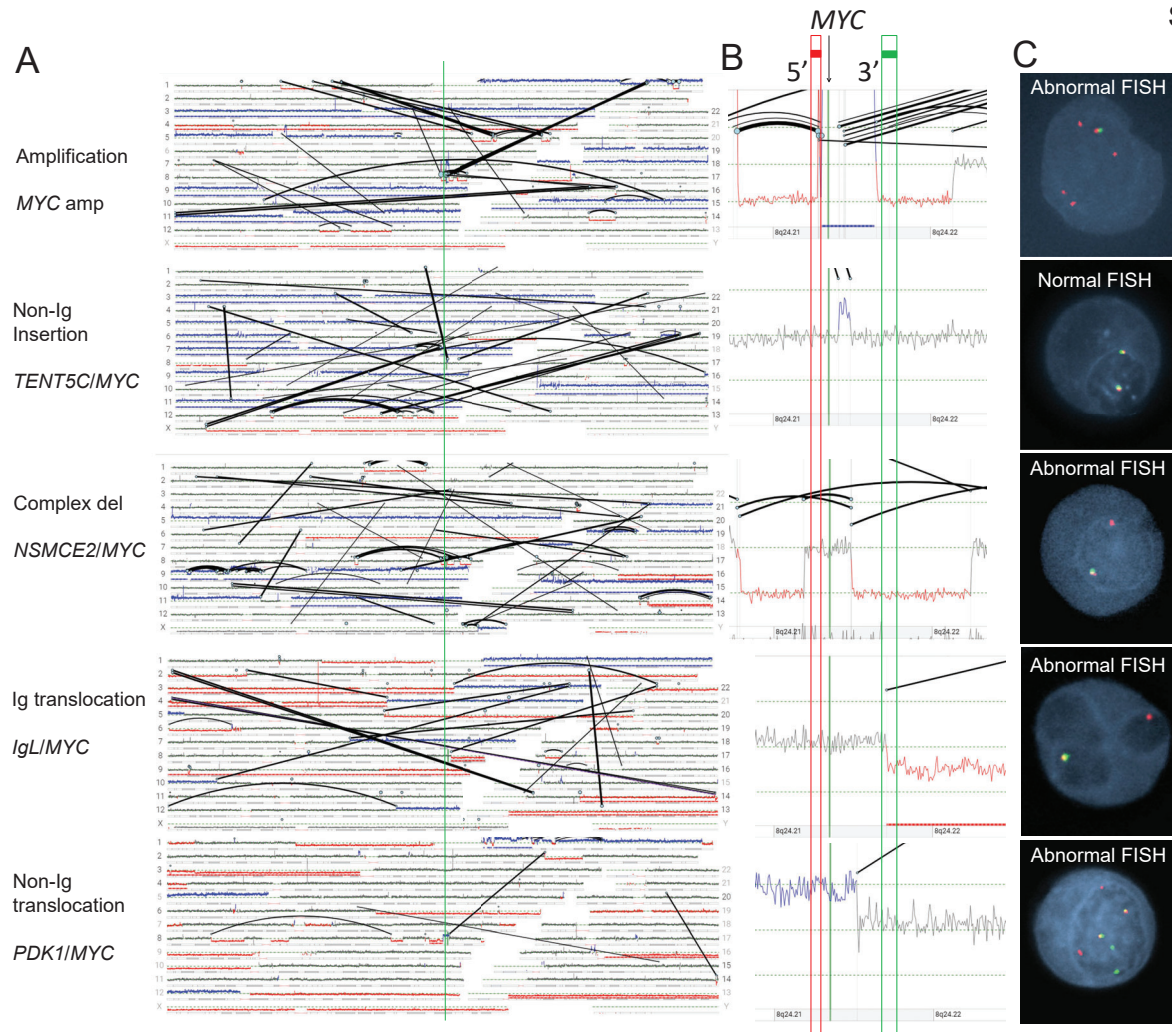

**Supplemental Figure 3: Schematic diagrams of *MYC* SV and genomic architecture identified by MPseq. A.** Five example cases showing whole genome view of each chromosome with green line indicating the location of the *MYC* gene on chromosome 8. Copy number gains indicated in blue, copy number losses indicated in red and structural variations indicated as black lines. **B.** Focused plots of the *MYC* gene as green line with FISH probe footprints (red box, 5' *MYC* and green box, 3' *MYC*). **C.** Interphase FISH results of a single representative cell showing 5' *MYC* as red and 3' *MYC* as green. Normal *MYC* results are indicated as 2 fusion signals. Lower cell represents a tetraploid clone.
