# Supplementary material
Source: PubMed Central journal article supplement (PMC9401535)
Supplement: 10780432ccr210005-sup-258208_4_supp_7202691_qv243y.pdf [file 10780432ccr210005-sup-258208_4_supp_7202691_qv243y.pdf]

Supplemental Figure 2

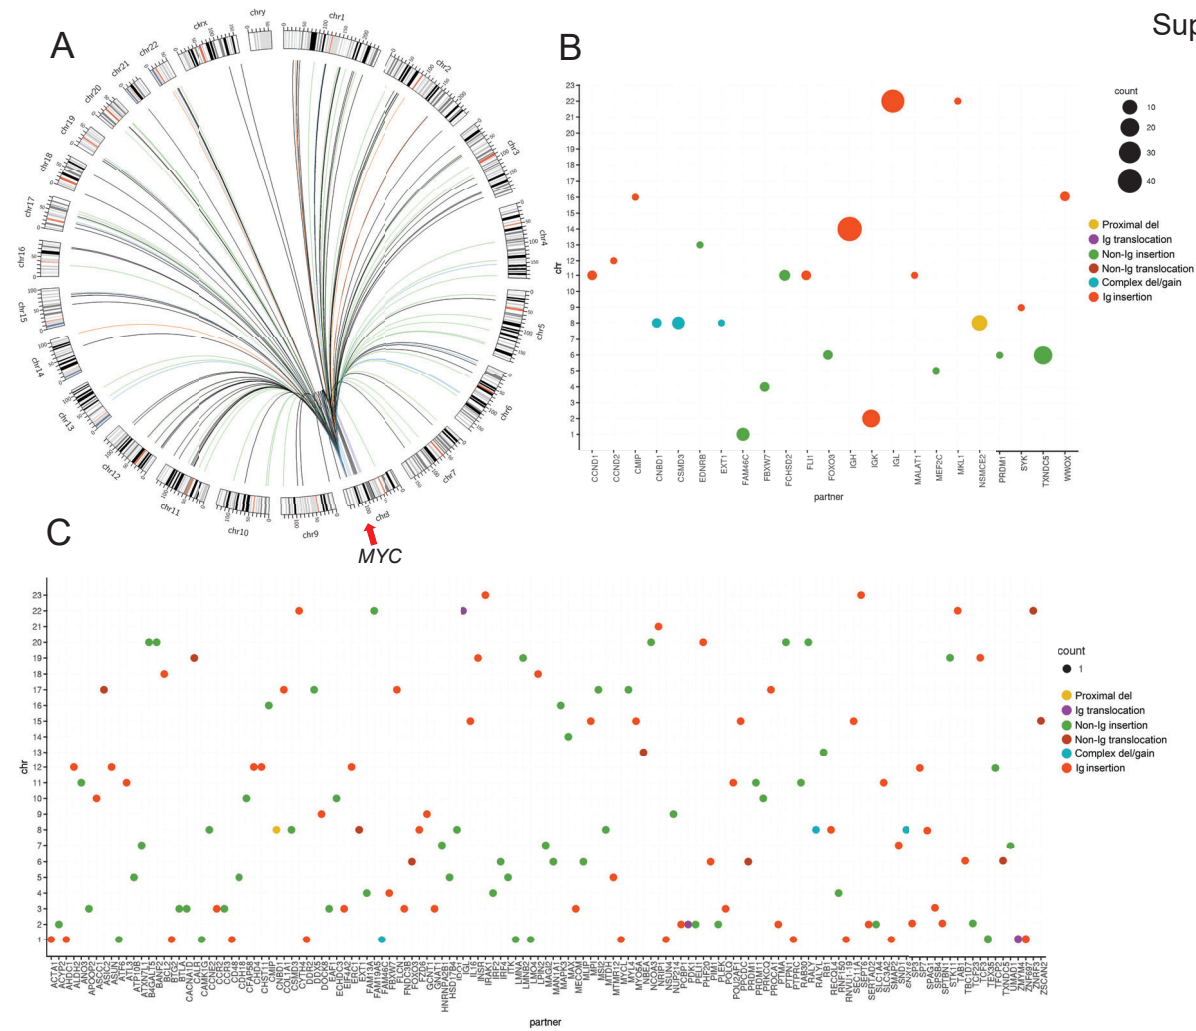

**Supplemental Figure 2: *MYC* abnormality subgroups and partner genes.** **A.** Circos plot depicting each *MYC* SV in relation to chromosomal location. Bubble plots for *MYC* rearrangement partners. Gene name (x axis) is plotted by chromosome (y axis). Rearrangement frequencies are indicated with circle size, and rearrangement group by color (see legend). *MYC* genes with 2 or more partners are indicated in **B** and genes with only one partner is indicated in **C**. Chr23 represents chromosome X and no rearrangements involving chromosome Y were detected.
